# Supplementary material for: Quantification of EGFR and EGFR-overexpressed cancer cells based on carbon dots@bimetallic CuCo Prussian blue analogue
Source: Royal Society of Chemistry journal article supplement (doi:10.1039/d0ra01439g), 2020-01-01
Supplement: d0ra01439g1.pdf [file d0ra01439g1.pdf]

**Supplementary Material for**  
**Quantification of EGFR and EGFR-overexpressed cancer cells based**  
**on carbon dots@bimetallic CuCo Prussian blue analogue**

Yingpan Song, Lina He, Kun Chen, Minghua Wang, Longyu Yang, Linghao He, Chuanpan

Guo, Qiaojuan Jia, Zhihong Zhang\*

Henan Provincial Key Laboratory of Surface and Interface Science, Zhengzhou University of  
Light Industry, No. 136, Science Avenue, Zhengzhou 450001, P. R. China.

Corresponding authors

\*E-mail addresses: mainzhz@163.com

## **Contents**

### **S1. Experimental section**

#### **S1.1 Chemicals and reagents**

#### **S1.2 Preparation of phosphate buffered, aptamer, EGFR and real sample solutions**

#### **S1.3 Preparation of carbon dots**

#### **S1.4 Preparation of CuCo Prussian blue analogue (CuCo PBA)**

#### **S1.5 Pre-treatment of the bare gold electrode**

#### **S1.6 Characterizations**

#### **S1.7 Cell culture**

#### **S1.8 Cytotoxicity in vitro**

#### **S1.9 Cell imaging**

### **S2. Chemical structure and components of CuCo PBA and CD@CuCoPBA**

### **S3. Surface morphology of the CuCo PBA nanocubes**

### **S4. Electrochemical performance of CuCo PBA and CD@CuCoPBA nanocomposite**

## **S1. Experimental section**

### **S1.1 Chemicals and reagents**

Copper nitrate trihydrate ( $\text{Cu}(\text{NO}_3)_2 \cdot 3\text{H}_2\text{O}$ ), potassium hexacyanocobaltate(III) ( $\text{K}_3[\text{Co}(\text{CN})_6]$ ), potassium dihydrogen phosphate ( $\text{KH}_2\text{PO}_4 \cdot 12\text{H}_2\text{O}$ ), disodium hydrogen phosphate ( $\text{Na}_2\text{HPO}_4 \cdot 12\text{H}_2\text{O}$ ) and potassium gold chloride ( $\text{HAuCl}_4 \cdot 3\text{H}_2\text{O}$ ) were purchased from Aladdin Technology Co., Ltd., (Beijing, China). Dimethyl sulfoxide (DMSO) was obtained from Solarbio Life Sciences Reagent Co. Ltd. (Shanghai, China). The epidermal growth factor receptor (EGFR), human epidermal growth factor receptor-2, mouse immunoglobulin G, immunoglobulin E, prostate specific antigen, bovine serum albumin, and carcino embryonic antigen were purchased from Solarbio Life Sciences Reagent Co. Ltd. (Shanghai, China). All of reagents were of analytical grade and used directly without further purification and prepared using Milli-Q water with a resistivity of greater than  $18 \text{ M}\Omega \cdot \text{cm}$  throughout all experiments. The EGFR-targeted aptamer sequence is listed as 5'-TGA ATG TTG TTT TTT CTC TTT TCT ATA GTA-3'.<sup>1</sup>

### **S1.2 Preparation of phosphate buffered, aptamer, EGFR and real sample solutions**

Phosphate buffered solution (PBS, 0.01 M, pH 7.4) was prepared by mixing 0.24 g  $\text{KH}_2\text{PO}_4$ , 1.44 g  $\text{Na}_2\text{HPO}_4 \cdot 12\text{H}_2\text{O}$ , 0.20 g KCl, and 8.0 g NaCl. The stock solution of aptamer (50 nM), EGFR ( $1 \text{ fg} \cdot \text{mL}^{-1}$ – $1 \text{ ng} \cdot \text{mL}^{-1}$ ), and all of the interferences ( $10 \text{ pg} \cdot \text{mL}^{-1}$ ) were prepared using PBS which were filtered with a  $0.22 \mu\text{m}$  membrane and adjusted to neutral pH before use. PBS containing  $\text{K}_3[\text{Fe}(\text{CN})_6]$  (1.65 g) and  $\text{K}_4[\text{Fe}(\text{CN})_6]$  (2.11 g) was used for the electrolyte solution. All solutions were prepared immediately before each experiment and stored at  $4 \text{ }^\circ\text{C}$  until use.

To analyze the real application of the fabricated aptasensors, the human serum was diluted with 0.01 M PBS (pH 7.4) to 200 times in prior to analysis. Afterwards, EGFR with certain concentration was added into the diluted PBS. The solution of real samples were stored at 4 °C for further detection by the proposed method.

### **S1.3 Preparation of carbon dots**

Carbon dots (CDs) were synthesized in according to the literature.<sup>2</sup>

### **S1.4 Preparation of CuCo Prussian blue analogue (CuCoPBA)**

According to the reported literature,<sup>3</sup> CuCo PBA was prepared using a slightly modified method. In brief, 0.133 g of  $K_3[Co(CN)_6]$  and 0.145 g of  $Cu(NO_3)_2$  were dissolved in 15 mL of Milli-Q water to obtain Solution **A**, whereas 0.265 g of sodium citrate was dissolved in 15 mL of Milli-Q water to obtain Solution **B**. Afterward, Solution **A** was added into Solution **B** under magnetic stirring and aged for further 24 h at room temperature. The resultant precipitate was collected by centrifuging at 8000 rpm for 5 min, following by washing with water several times, and drying under vacuum at 60 °C for 6 h. Finally, the CuCo PBA powder was obtained.

### **S1.5 Pre-treatment of the bare gold electrode**

Bare Au electrode (AE) with 3 mm diameter was polished into a smooth surface by using 0.05  $\mu\text{m}$  alumina powder and ultrasonically washed in piranha solution (v/v,  $H_2SO_4:H_2O_2 = 7:3$ ) for 15 min. The electrode was electrochemically cleaned through oxidation and reduction cycling in 0.5 M  $H_2SO_4$  from  $-0.2$  V to 1.6 V (vs. Ag/AgCl), rinsed with Milli-Q water, and dried under nitrogen.

### **S1.6 Characterizations**

X-ray photoelectron spectroscopy (XPS) analysis was determined using an AXIS HIS 165 spectrometer (Kratos Analytical, Manchester, U.K.) with a monochromatized Al  $K_{\alpha}$  X-ray source (1486.71 eV photons). X-ray diffraction measurements (XRD) were recorded on a Rigaku D/Max-2500 X-ray diffractometer using Cu  $K_{\alpha}$  radiation. Fourier transform infrared spectroscopy (FT-IR) spectra were characterized by using a Bruker Tensor 27 OPUS FT-IR spectrometer (with KBr pellet) within the 4000–400  $\text{cm}^{-1}$  range. The surface morphology of the synthesized samples was investigated through scanning electron microscope (SEM, JSM-6490LV, Japan) and high-resolution transmission electron microscopy (HR-TEM, FEI Talos F200S) with a field emission gun of 200 kV.

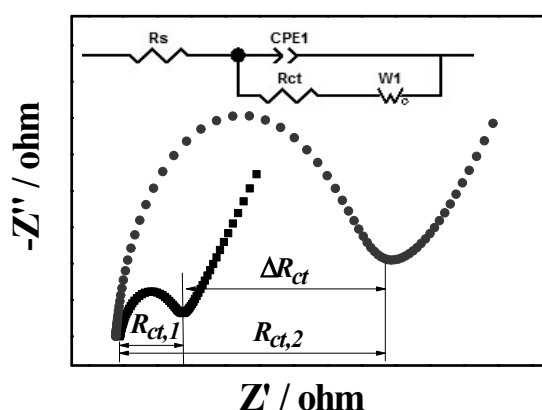

**Fig. S1** EIS Nyquist plots and equivalent circuit.

### S1.7 Cell culture

MCF-7 cancer cells were obtained from American Type Culture Collection and grown in Dulbecco's modified Eagle medium medium with 10% heat inactivated fetal bovine serum and antibiotics (50 units·mL<sup>-1</sup> penicillin and 50 units·mL<sup>-1</sup> streptomycin). The cells were maintained at 37 °C in 5% CO<sub>2</sub> until use.

### S1.8 Cytotoxicity in vitro

3-(4,5-dimethylthiazol-2-yl)-2,5-diphenyltetrazolium bromide (MTT) assay was

employed to evaluate the in vitro cytotoxicity of CD@CuCoPBA to MCF-7 cells. Cells were seeded in 96-well plates with a density of 8000 cells·well<sup>-1</sup> and incubated prior to treatment with nanocomposite. After 24 h, the medium was replaced by fresh medium containing different concentrations of CD@CuCoPBA, and incubated for another 24 h. Then, the medium was discarded, and cells were washed twice with PBS. After 24 h of incubation in medium, MTT (5 mg·mL<sup>-1</sup>, 20 μL) was added and the cells were cultured for another 4 h. Finally, 150 μL of DMSO was added to the plate wells, following by shaking the plates for 15 min. The absorbance values at 488 nm were measured with a microplate reader.

### **S1.9 Cell imaging**

MCF-7 cells were seeded in a laser confocal culture dish with a density of 1×10<sup>5</sup> cells·well<sup>-1</sup> and incubated at 37 °C and 5% CO<sub>2</sub>. After 8 h, the media was replaced with media containing the CD@CuCoPBA nanocomposite (50 μg·mL<sup>-1</sup>). After treatment, the cells were washed with PBS and fixed with 4% paraformaldehyde for 10 min at 37 °C. The fixed cells were then washed with PBS. All images were obtained with a Zeiss 710 LSM using a 420 nm HeNe laser excitation source.

## S2. Chemical structure and components of CuCo PBA and CD@CuCoPBA

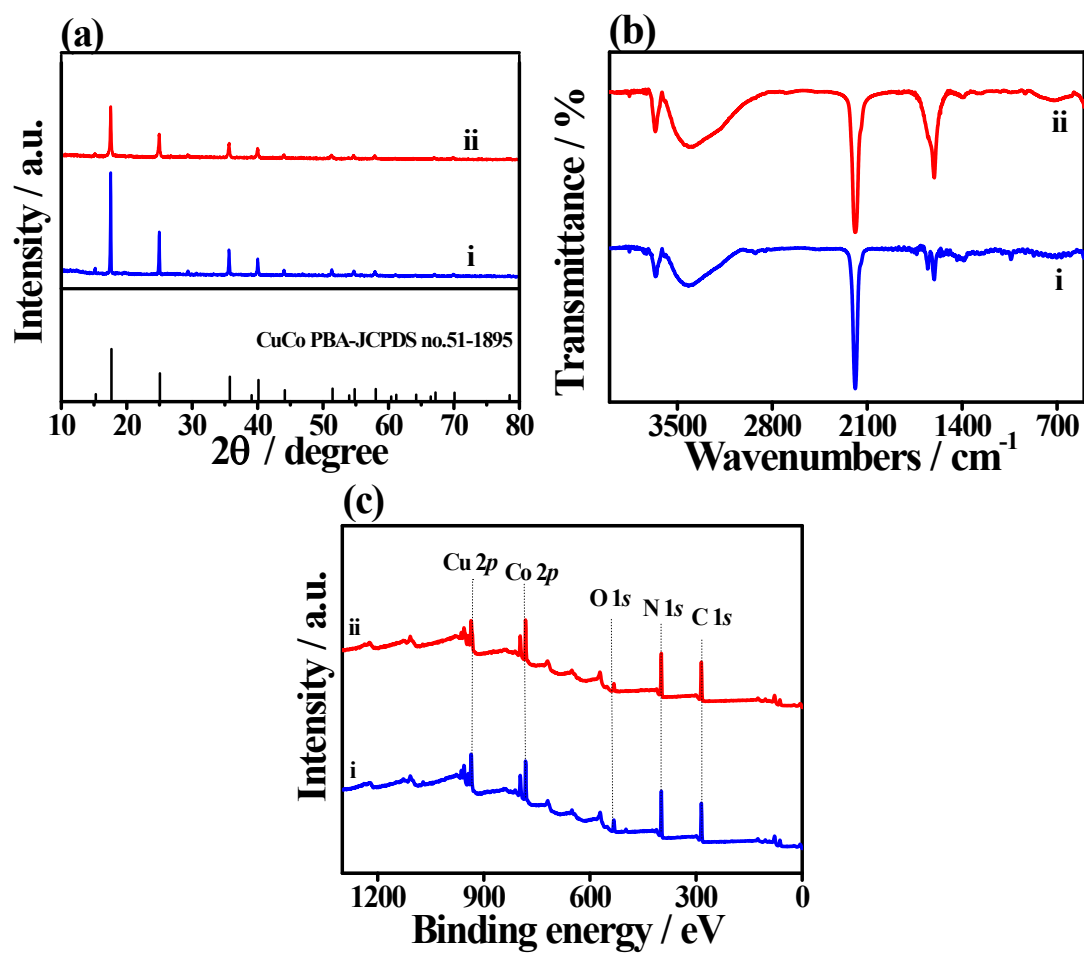

**Fig. S2** (a) XRD patterns, (b) FTIR, and (c) XPS survey spectra of (i) CuCo PBA and (ii) CD@CuCoPBA nanocomposite.

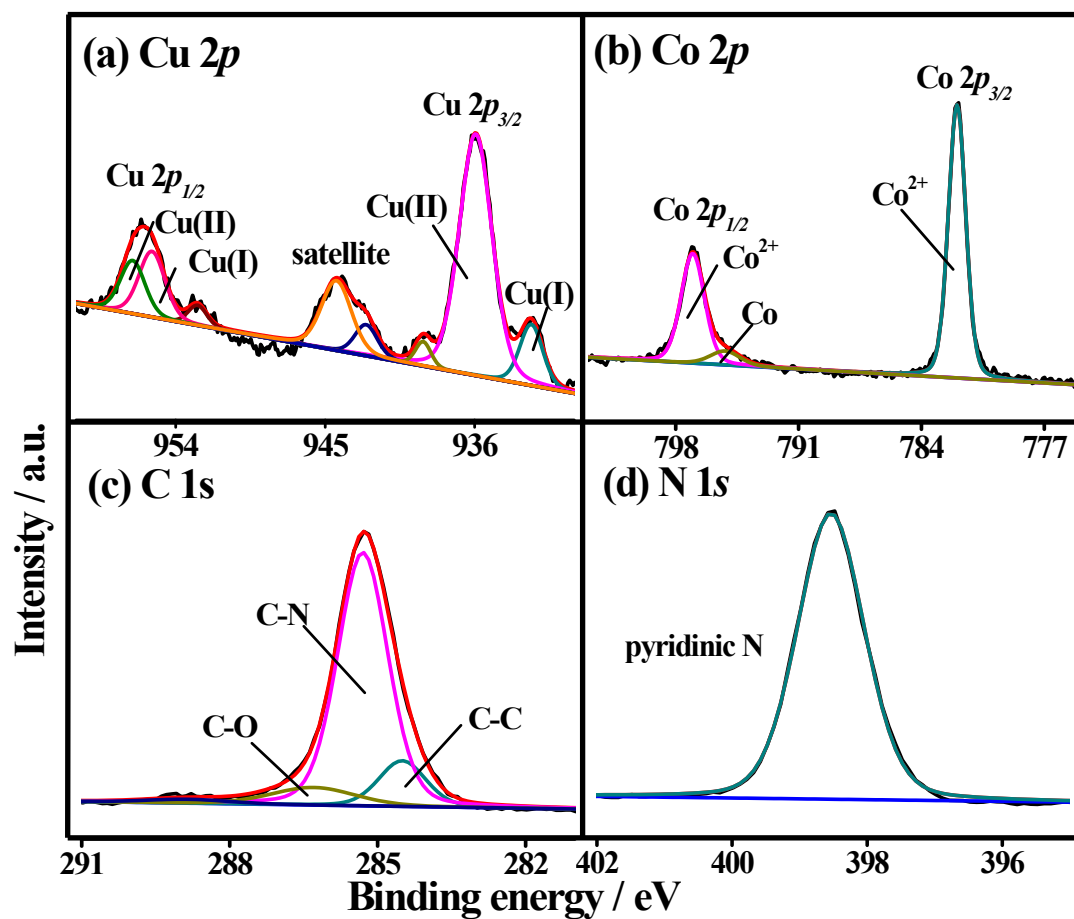

Fig. S3 The high-resolution Co 2p, Cu 2p, C 1s, and N 1s XPS spectra of the CuCo PBA nanocubes.



### S3. Surface morphology of CuCo PBA

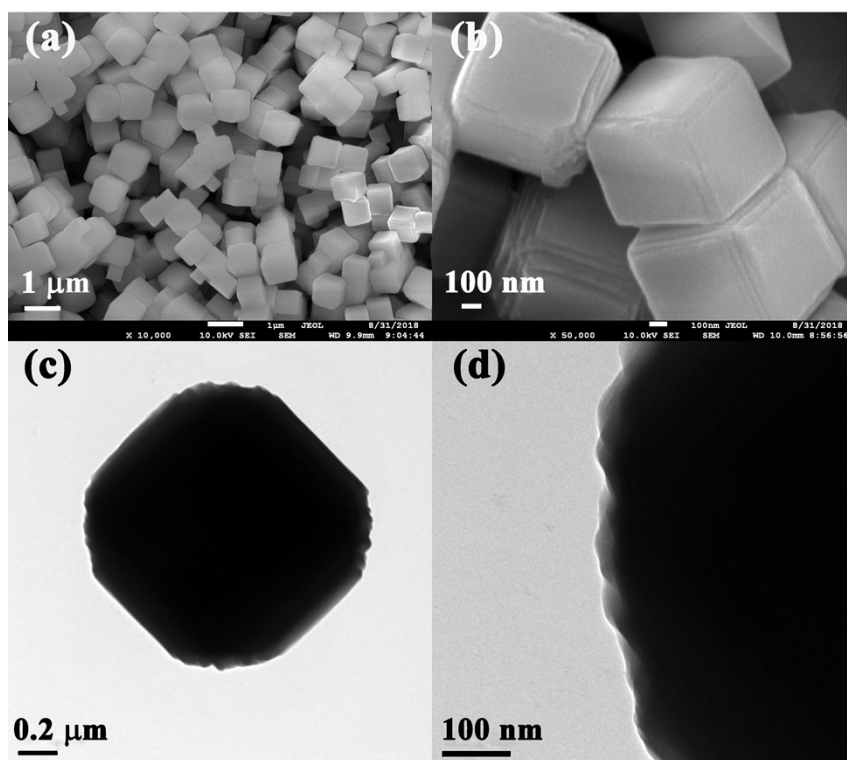

**Fig. S4** (a, b) Low- and high-magnification SEM images and (c, d) TEM and HRTEM images of CuCo PBA nanocubes.

#### S4. Electrochemical performance of CuCo PBA and CD@CuCoPBA

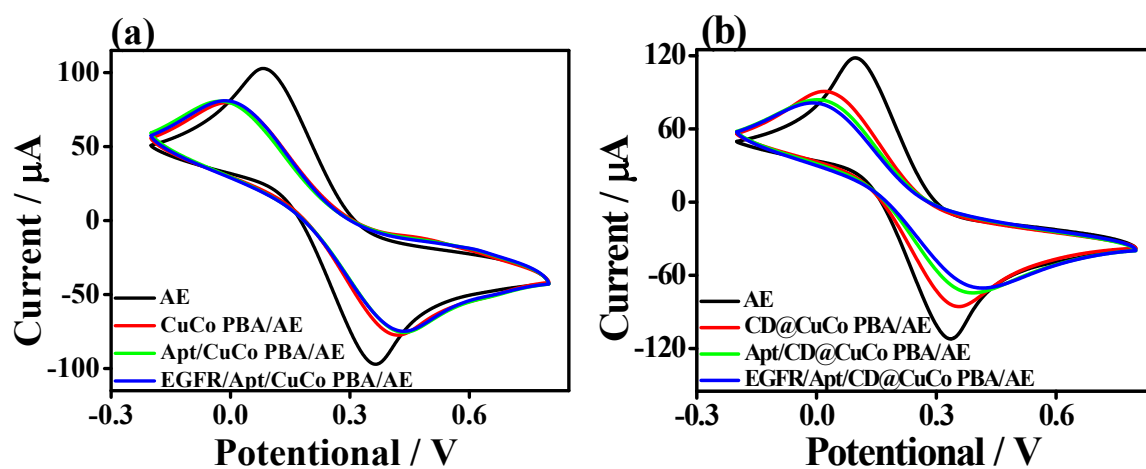

**Fig. S5** CV curves for tracing the whole procedure for detecting EGFR using the developed aptasensor based on (a) the pristine CuCo PBA and (b) CD@CuCoPBA nanocomposite in 0.01 M PBS (pH 7.4) containing 5.0 mM  $[\text{Fe}(\text{CN})_6]^{3-/4-}$  redox.

**Table S1** Detection of EGFR in human serum samples with the developed aptasensor.

| <b>Amount added</b><br><b>(pg·mL<sup>-1</sup>)</b> | <b><math>\Delta R_{ct}</math></b><br><b>(ohm)</b> | <b>Found</b><br><b>(pg·mL<sup>-1</sup>)</b> | <b>Recovery</b><br><b>(%)</b> | <b>RSD</b><br><b>(%)</b> |
|----------------------------------------------------|---------------------------------------------------|---------------------------------------------|-------------------------------|--------------------------|
| 0.005                                              | 300                                               | 0.00472                                     | 94.4                          | 2.6                      |
| 0.05                                               | 612                                               | 0.0513                                      | 102.6                         | 3.7                      |
| 0.5                                                | 905                                               | 0.479                                       | 95.7                          | 1.9                      |
| 5                                                  | 1219                                              | 5.20                                        | 104.0                         | 4.5                      |
| 50                                                 | 1519                                              | 51.4                                        | 102.8                         | 4.1                      |
| 500                                                | 1823                                              | 498.88                                      | 99.8                          | 3.1                      |

**Table S2** Comparison with other published work for the detection of MCF-7 cells.

| <b>Materials</b>                                | <b>Methods</b>                         | <b>Detection</b><br><b>range</b><br><b>(cell·mL<sup>-1</sup>)</b> | <b>LOD</b><br><b>(cell·mL<sup>-1</sup>)</b> | <b>Refs</b>      |
|-------------------------------------------------|----------------------------------------|-------------------------------------------------------------------|---------------------------------------------|------------------|
| Ag-PAMAM-luminol<br>nanocomposites              | Electrochemiluminescence               | $2 \times 10^2 - 9 \times 10^3$                                   | 150                                         | [4]              |
| Aptamer-functionalized<br>gold nanorods         | Localized surface plasmon<br>resonance | $1 \times 10^1 - 1 \times 10^5$                                   | 100                                         | [5]              |
| AuNPs@graphene                                  | Electrochemiluminescence               | $5 \times 10^2 - 2 \times 10^7$                                   | 230                                         | [6]              |
| NaYF <sub>4</sub> :Yb,Er/TiO <sub>2</sub> /CdTe | Photoelectrochemical                   | $1 \times 10^3 - 1 \times 10^5$                                   | 400                                         | [7]              |
| Platinum nanoparticles<br>/graphene oxide       | Colorimetric assay                     | $0 - 8 \times 10^3$                                               | 125                                         | [8]              |
| <b>CD@CuCoPBA</b>                               | <b>EIS</b>                             | <b><math>5 \times 10^2 - 1 \times 10^5</math></b>                 | <b>80</b>                                   | <b>This work</b> |

## References

- 1 W. Yan, M. Tao, B. Jiang, M. Yao, Y. Jun, W. Dai, Z. Tang, Y. Gao, L. Zhang, X. Chen and Q. Wang, *Cell. Physiol. Biochem.*, 2018, **50**, 79-91.
- 2 L. Song, Y. Cui, C. Zhang, Z. Hu and X. Liu, *RSC Adv.*, 2016, **6**, 17704-17712.
- 3 L. Han, T. Yu, W. Lei, W. Liu, K. Feng, Y. Ding, G. Jiang, P. Xu and Z. Chen, *J. Mater. Chem. A*, 2017, **5**, 16568-16572.
- 4 Y. Wang, N. Hao, Q. Feng, H. Shi, J. Xu and H. Chen, *Biosens. Bioelectron.*, 2016, **77**, 76-82.
- 5 Y. Li, Y. Zhang, M. Zhao, Q. Zhou, L. Wang, H. Wang, X. Wang and L. Zhan, *Chem. Commun.*, 2016, **52**, 3959-3961.
- 6 M. Su, H. Liu, L. Ge, Y. Wang, S. Ge, J. Yu and M. Yan, *Electrochim. Acta*, 2014, **146**, 262-269.
- 7 Z. Qiu, J. Shu and D. Tang, *Anal. Chem.*, 2018, **90**, 1021-1028.
- 8 L. Zhang, H. Deng, F. Lin, X. Xu, S. Weng, A. Liu, X. Lin, X. Xia and W. Chen, *Anal. Chem.*, 2014, **86**, 2711-2718.
